# Supplementary material
Source: publisher figshare collection journal article supplement (https://karger.figshare.com/ndownloader/files/8706175)
Supplement: Supplementary file 1 [file 8706175]

Supplemental Table 1. Components of the neuropsychiatric battery in the Dialysis and Cognition Study.

| Function Assessed                                        | Cognitive Test                    | Scoring                                 | Test Details                                                                                                                                                                                                                                                                                                                                                                       |
|----------------------------------------------------------|-----------------------------------|-----------------------------------------|------------------------------------------------------------------------------------------------------------------------------------------------------------------------------------------------------------------------------------------------------------------------------------------------------------------------------------------------------------------------------------|
| Cognitive Screen                                         | Mini-Mental State Exam            | Number Correct                          | Thirty-point questionnaire that samples abilities such as arithmetic, memory, and orientation.                                                                                                                                                                                                                                                                                     |
| Intelligence                                             | North American Adult Reading Test | $128.7 - (0.89 * \# \text{ of errors})$ | Estimation of verbal intelligence quotient that requires subjects to read a list of 61 words out loud.                                                                                                                                                                                                                                                                             |
| Supraspan Learning & Word Recall                         | Immediate Recall*                 | Total initially correct                 | A test of memory in which a list of 12 words is presented during 4 trials, and retention of these words is tested after a delay of 25 to 35 minutes. Calculated scores include <i>immediate recall</i> (which is the sum of words recalled during the 4 trials), <i>percent retention</i> [(delayed recall / trial 4 of immediate recall) x 100], and <i>delayed recognition</i> . |
|                                                          | Percent Retention*                | Percent recall after delay              |                                                                                                                                                                                                                                                                                                                                                                                    |
|                                                          | Delayed Recognition*              | Number of correctly identified words    |                                                                                                                                                                                                                                                                                                                                                                                    |
| Visual Construction & Fluid Reasoning                    | Block Design^                     | Number completed weighted for time      | Subjects are required to reproduce depicted patterns using a set of colored blocks.                                                                                                                                                                                                                                                                                                |
| Attention, Mental Processing Speed, & Executive Function | Digit Symbol-Coding^              | Number of copied symbols in 2 minutes   | Symbols are decoded by matching a given symbol to a digit provided in an answer key.                                                                                                                                                                                                                                                                                               |
|                                                          | Trail Making Test A               | Time to Completion                      | “Connect-the-dots” for a consecutive number sequence from 1 to 25.                                                                                                                                                                                                                                                                                                                 |
|                                                          | Trail Making Test B               | Time to Completion                      | “Connect-the-dots” alternating between numbers (1 to 13) and letters (A to L).                                                                                                                                                                                                                                                                                                     |

\* Derived from the Word List Learning subtest of the Wechsler Memory Scale - III (WMS-III)

^From the Weschler adult intelligence scale
